# Supplementary material
Source: ML conference proceedings conference paper supplement (https://openreview.net/forum?id=06jLJiUAKX)

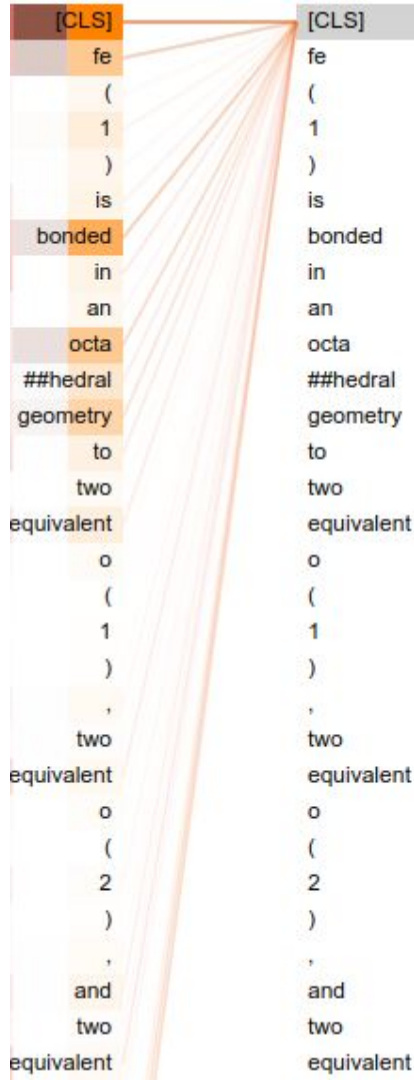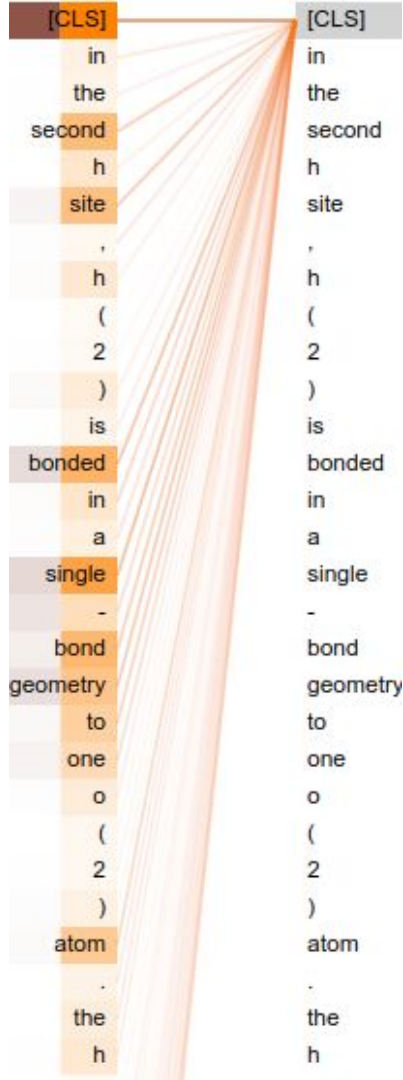

Supplement: supplementary_material [file attachment]

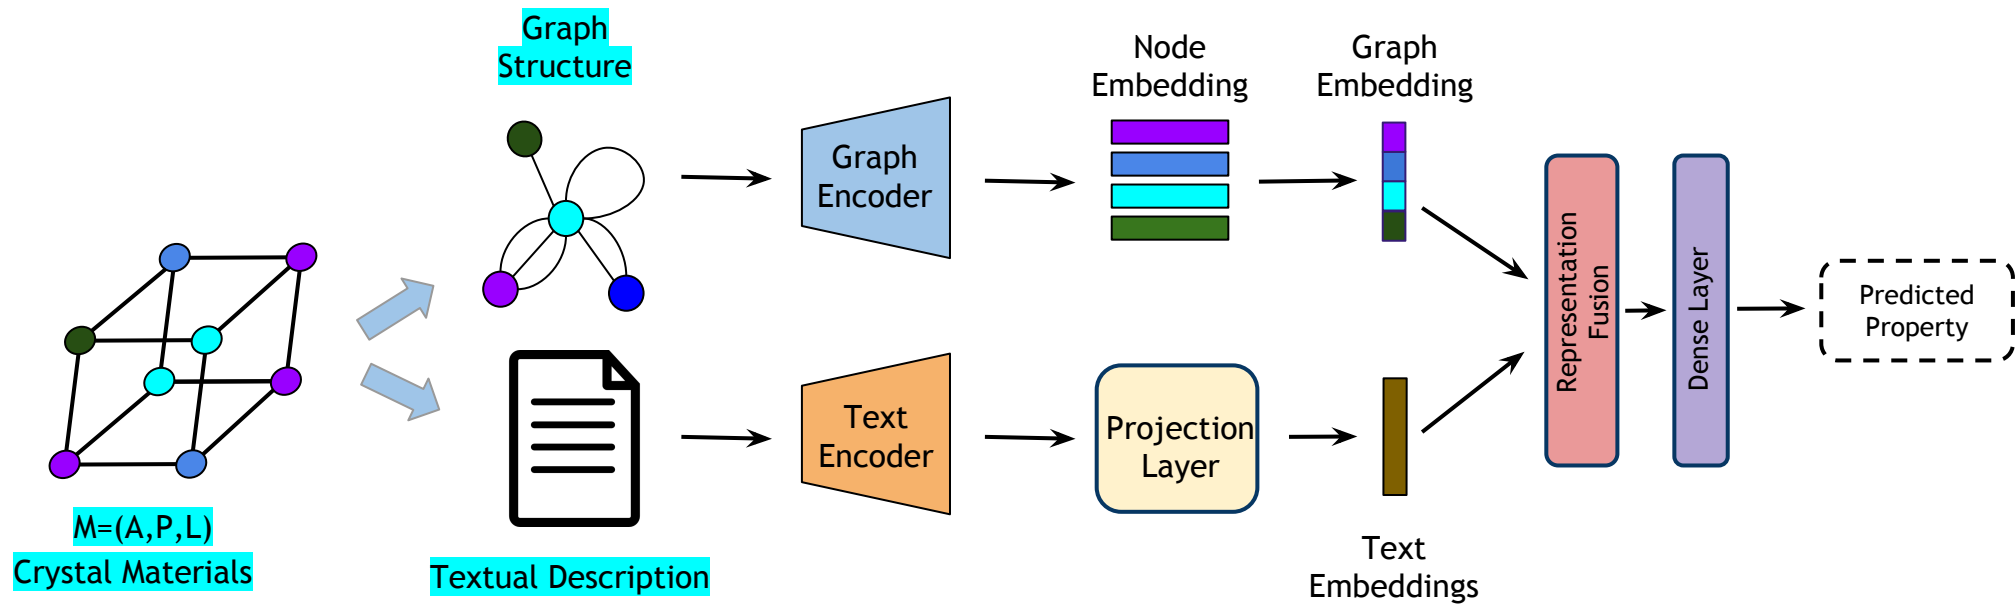

Supplement: supplementary_material [file attachment]

■ Global + Local Knowledge ■ Only Global Knowledge ■ Only Local Knowledge

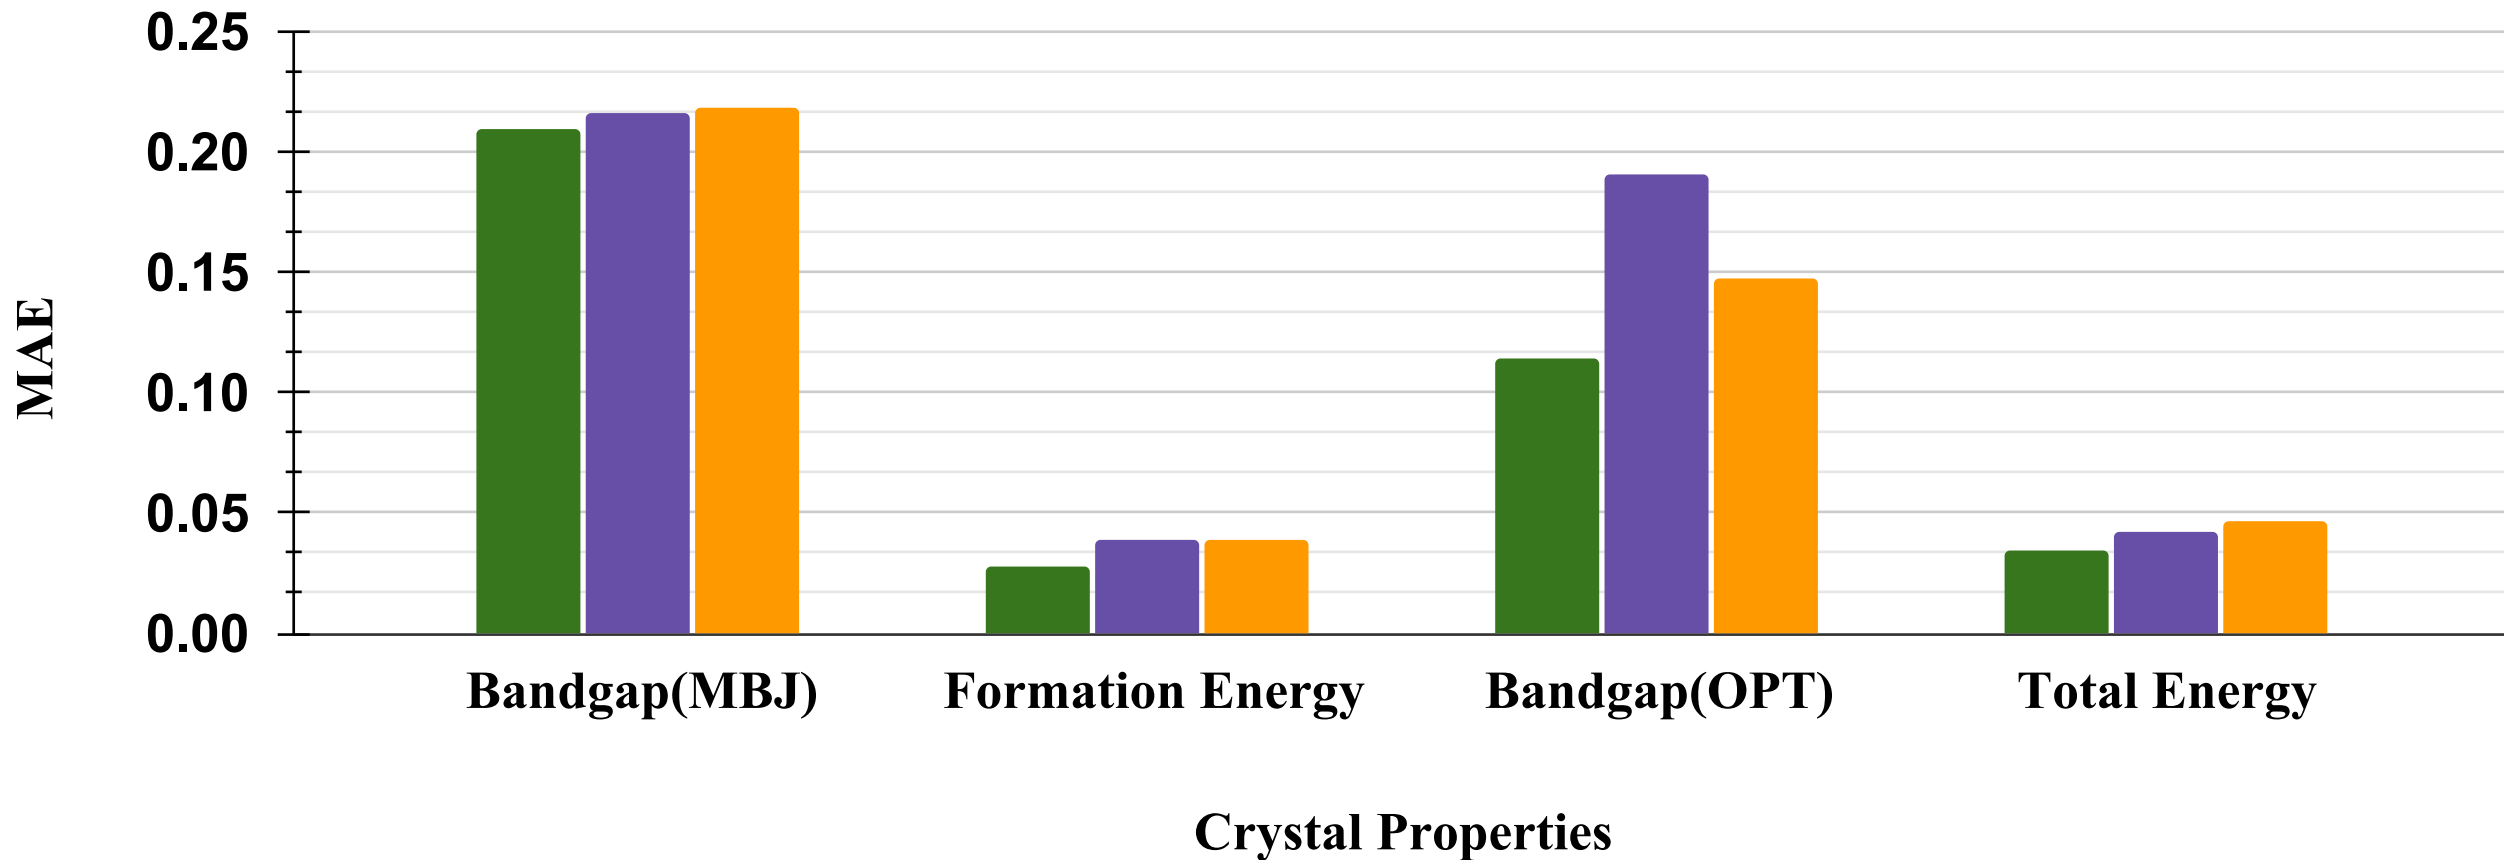

Supplement: supplementary_material [file attachment]

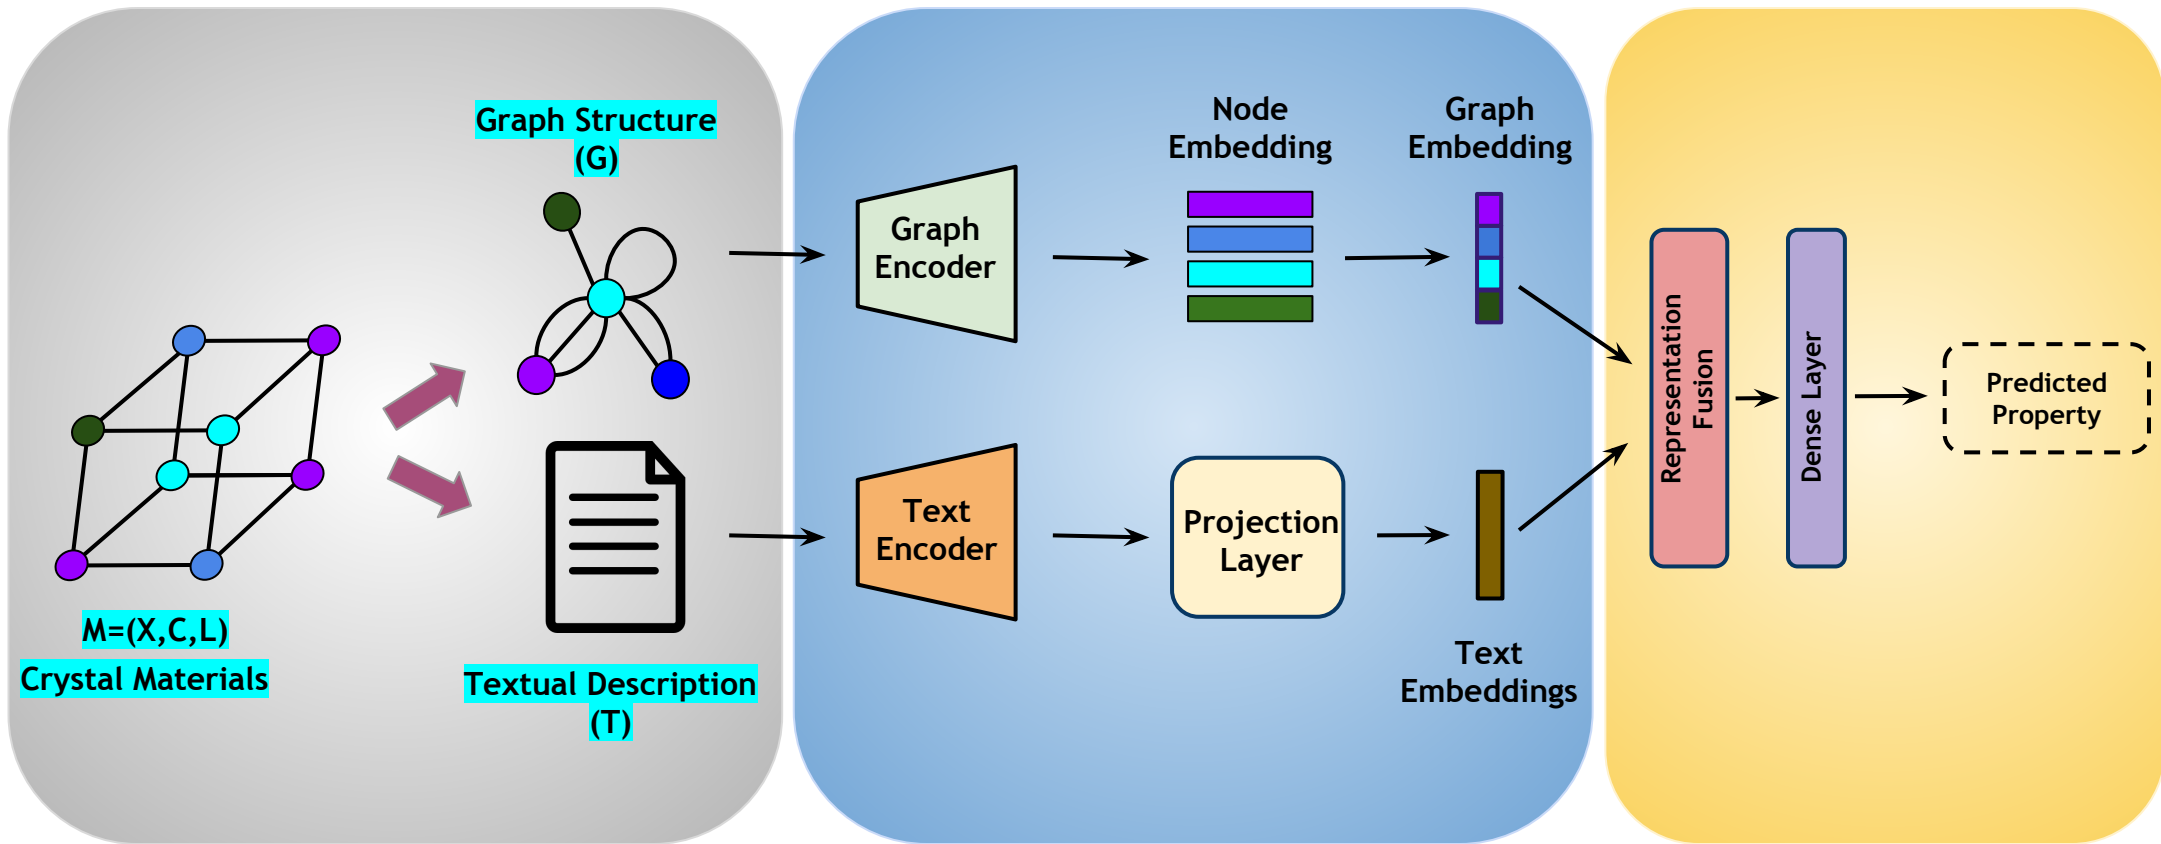

Supplement: supplementary_material [file attachment]

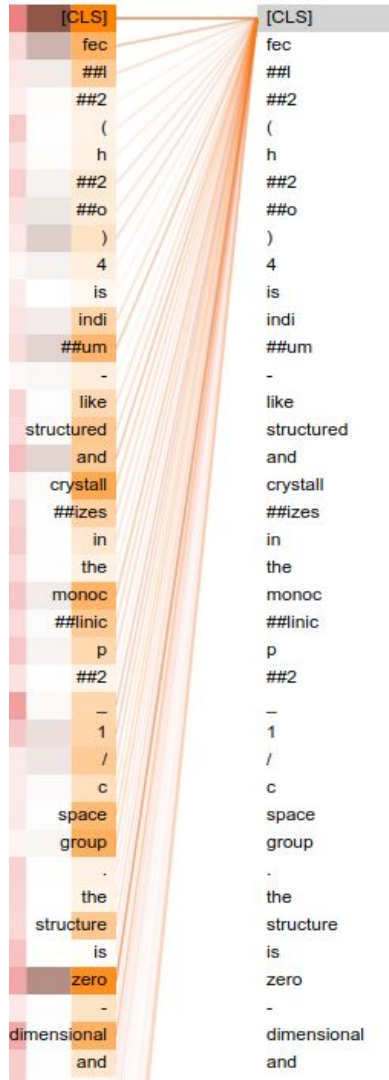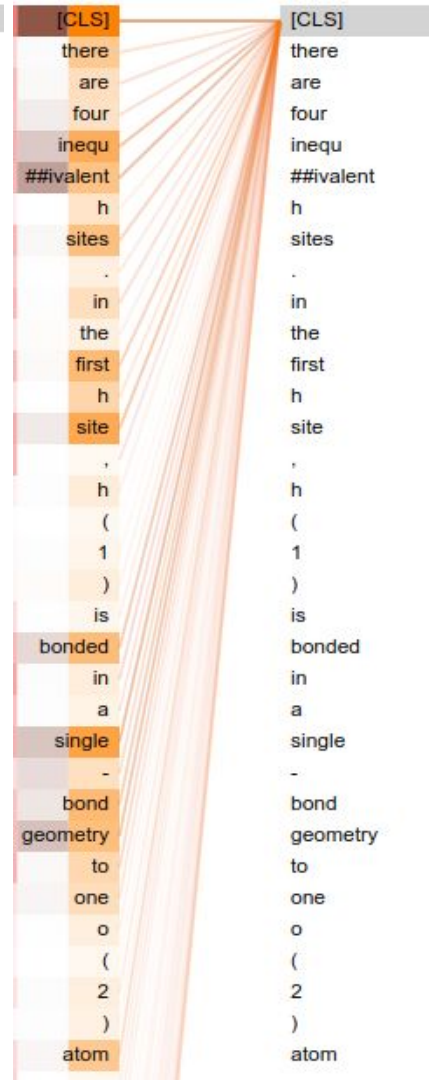

Supplement: supplementary_material [file attachment]
